# Supplementary material for: Crystallization mechanism and defect passivation of Cu2ZnSn(S,Se)4 thin film solar cells via in situ potassium doping
Source: Royal Society of Chemistry journal article supplement (doi:10.1039/d3ta03421f), 2023-01-01
Supplement: d3ta03421f1.pdf [file d3ta03421f1.pdf]

### Supporting Information

#### Crystallization mechanism and defect passivation of $\text{Cu}_2\text{ZnSn}(\text{S},\text{Se})_4$ thin film solar cells via in-situ potassium doping

Liangzheng Dong<sup>a, b, c</sup>, Shengye Tao<sup>a, b, c</sup>, Ming Zhao<sup>a, b, c, \*</sup>, Daming Zhuang<sup>a, b, c, \*</sup>, Yafei Wang<sup>a, b, c</sup>,

Hanpeng Wang<sup>a, b, c</sup>, Mengyao Jia<sup>a, b, c</sup>, Junsu Han<sup>a, b, c</sup>, Hongwei Zhu<sup>a, c</sup>

<sup>a</sup> School of Materials Science and Engineering, Tsinghua University, 100084 Beijing, PR China

E-mail: zhaoming2013@mail.tsinghua.edu.cn; dmzhuang@tsinghua.edu.cn

<sup>b</sup> Key Laboratory for Advanced Materials Process Technology of Ministry of Education, Tsinghua University, 100084 Beijing, PR

China

<sup>c</sup> State Key Laboratory of New Ceramics and Fine Processing, 100084 Beijing, PR China

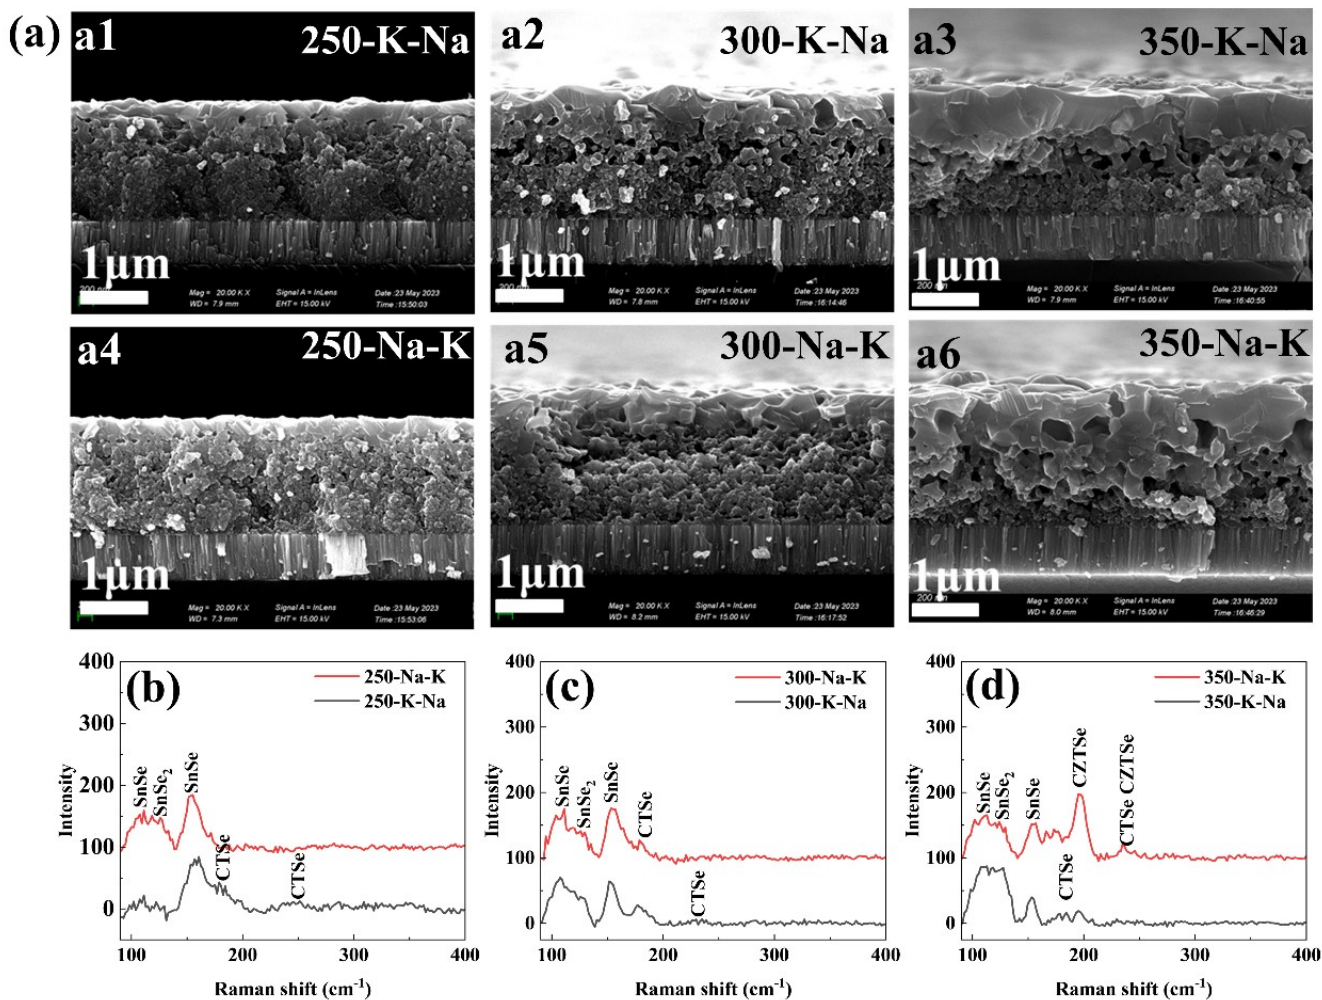

**Fig. S1. (a) Cross section SEM images of CZTSSe absorbers annealed at different temperatures (250°C, 300°C and 350°C). Raman spectra of absorbers annealed at (b)250°C, (c)300°C and (d)350°C.**

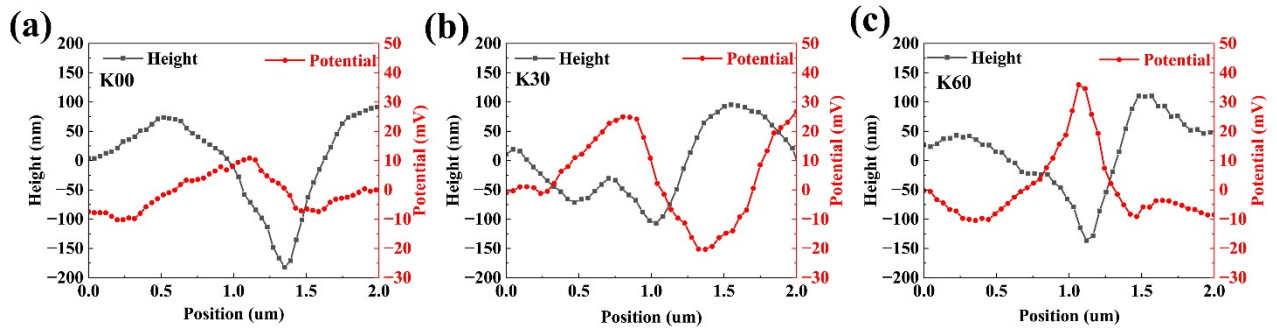

**Fig. S2. The line-scan profiles of AFM topography and KPFM potential images of (a) K00, (b) K30 and (c) K60.**

Fig. S2(a) (b) (c) are extracted from line-scan shown in the AFM and KPFM images. It is identified that contact potential difference at grain boundaries is improved with the increase of K doping concentration.
