# Supplementary material for: Crystallization mechanism and defect passivation of Cu2ZnSn(S,Se)4 thin film solar cells via in situ potassium doping
Source: Royal Society of Chemistry journal article supplement (doi:10.1039/d3ta03421f), 2023-01-01
Supplement: d3ta03421f2.pdf [file d3ta03421f2.pdf]

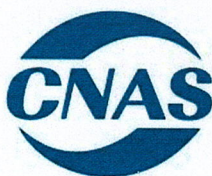

中国认可  
检测  
TESTING  
CNAS L2338

# TEST REPORT

Report No: PWQC-WT-P23022421-2R

**Sample Name** : Photovoltaic cell

**Client** : Tsinghua University

**Client Address** : 30 Shuangqing Rd, Hai Dian, Beijing

**Type of Project** : Consignation

PHOTOVOLTAIC AND WIND POWER SYSTEMS QUALITY TEST CENTER, IEE,  
CHINESE ACADEMY OF SCIENCES

February, 28, 2023

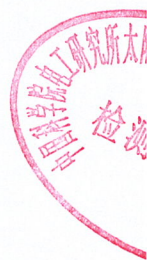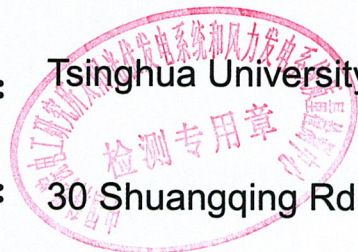

PHOTOVOLTAIC AND WIND POWER SYSTEMS QUALITY TEST CENTER, IEE,  
CHINESE ACADEMY OF SCIENCES

Report No: PWQC-WT-P23022421-2R

|                                                                                                                                                                                   |          |              |
|-----------------------------------------------------------------------------------------------------------------------------------------------------------------------------------|----------|--------------|
| <b>Testing information:</b><br>Date: February, 24, 2023<br>Location: No.6 Bei-er-tiao, Zhongguancun, Haidian district, Beijing, China<br>Environmental conditions: 24.6℃, 29.5%RH |          |              |
| <b>Testing items:</b><br>Measurement of photovoltaic current-voltage characteristics                                                                                              |          |              |
| <b>Standards:</b><br>IEC 60904-1: 2006 Photovoltaic (PV) devices<br>— Part 1: Measurement of photovoltaic current-voltage characteristics                                         |          |              |
| <b>Equipments:</b>                                                                                                                                                                |          |              |
| Name                                                                                                                                                                              | S/N      | Expired date |
| Solar simulator                                                                                                                                                                   | LE106-04 | 2023-06-15   |
| Source Meter                                                                                                                                                                      | LE177-01 | 2023-02-27   |
| Digital millimeter                                                                                                                                                                | LE126-01 | 2024-02-22   |
| Reference cell                                                                                                                                                                    | J-CH04   | 2023-11-09   |

Edited

by(signatory): *Yang lei*

Date: 2023-2-28

Approved

by(signatory): *Jiang Feifei*

Date: 2023-2-28

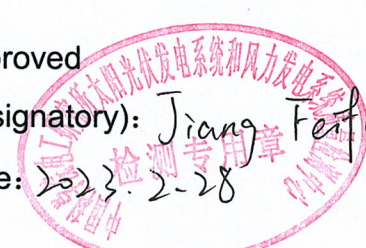

PHOTOVOLTAIC AND WIND POWER SYSTEMS QUALITY TEST CENTER, IEE,  
CHINESE ACADEMY OF SCIENCES

Report No: PWQC-WT-P23022421-2R

|                        |                                                                        |
|------------------------|------------------------------------------------------------------------|
| <b>Sample code</b>     | DC2023a008                                                             |
| <b>Sample S/N</b>      | K-60                                                                   |
| <b>Type</b>            | Single Junction Kesterite Solar Cell                                   |
| <b>Designated area</b> | 0.30cm <sup>2</sup><br>The designated area was provided by the client. |

|                                  |                                                             |                                      |                   |                              |                                        |
|----------------------------------|-------------------------------------------------------------|--------------------------------------|-------------------|------------------------------|----------------------------------------|
| <b>Items of testing</b>          | Measurement of photovoltaic current-voltage characteristics |                                      |                   |                              |                                        |
| <b>Sample code</b>               | DC2023a008                                                  |                                      |                   |                              |                                        |
| <b>Results</b>                   | <b>Isc</b><br>(mA)                                          | <b>Jsc</b><br>(mA/ cm <sup>2</sup> ) | <b>Voc</b><br>(V) | <b>Pm</b><br>(mW)            | <b>File</b><br><br>A202302241<br>63920 |
|                                  | 10.882                                                      | 36.273                               | 0.445             | 3.801                        |                                        |
|                                  | <b>Ipm</b><br>(mA)                                          | <b>Vpm</b><br>(V)                    | <b>FF</b><br>(%)  | <b>E<sub>ff</sub></b><br>(%) |                                        |
|                                  | 10.003                                                      | 0.380                                | 78.56             | 12.67                        |                                        |
| <b>Measurement uncertainty:</b>  |                                                             |                                      |                   |                              |                                        |
| U <sub>95(Isc)</sub> =1.9% (k=2) |                                                             |                                      |                   |                              |                                        |
| U <sub>95(Voc)</sub> =1.8% (k=2) |                                                             |                                      |                   |                              |                                        |
| U <sub>95(Pm)</sub> =2.5% (k=2)  |                                                             |                                      |                   |                              |                                        |

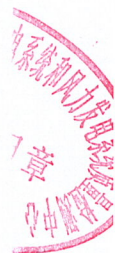

Report No: PWQC-WT-P23022421-2R

STC

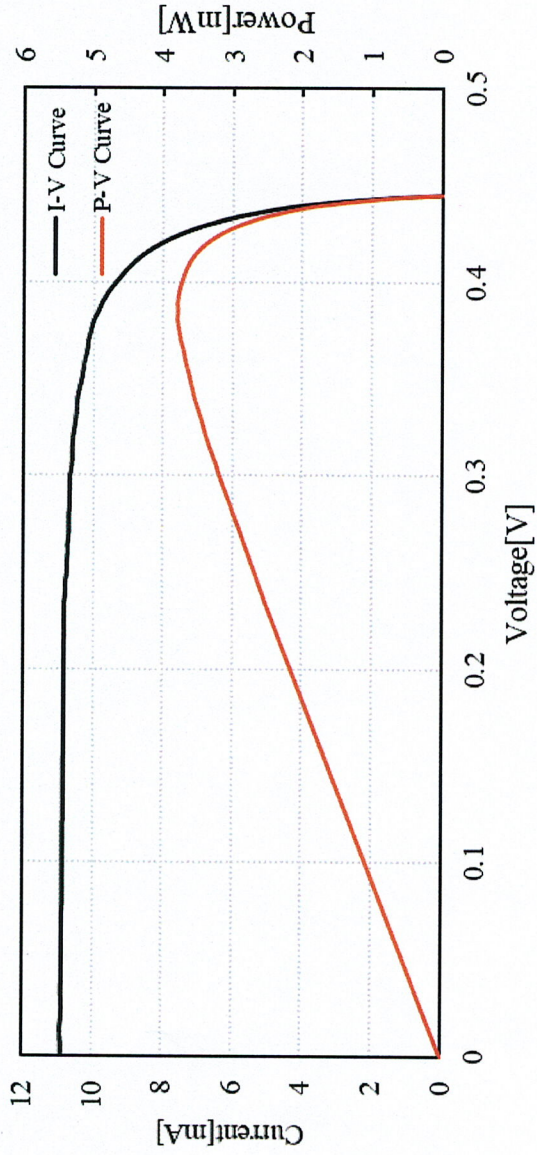

Type Single Junction Kesterite Solar Cell  
 Ser.No DC2023a008

Area 0.3000 cm<sup>2</sup>  
 Isc 10.882 mA  
 Jsc 36.273 mA/cm<sup>2</sup>  
 Voc 0.445 V  
 FF 78.56 %  
 Pm 3.801 mW  
 E<sub>ff</sub> 12.67 %  
 Ipm 10.003 mA  
 Vpm 0.380 V

Voltage Sweep Reverse  
 Sweep time 1.41 s  
 Temp 25 °C  
 Irr 100 mW/cm<sup>2</sup>  
 File A20230224163920

— End of Report —

## NOTICE

1. The test result in this report relate only to the sample tested.
2. This report is not available without seal of Photovoltaic and Wind Power Systems Quality Test Center, IEE, Chinese Academy of Sciences (PWQTC) . Additionally, Appendix pages are not available without seal of PWQTC.
3. The content of this report may not be changed. The report shall not be as any specific commercial advertisement without written permission of the PWQTC.
4. Any copy of this report is not available without seal of PWQTC.
5. This report may not be reproduced in any form or by any means, without permission in writing from the PWQTC.
6. Client could contact us for any questions within 15 days since the date when you received this report.

Address: No.6 Bei-er-tiao, Zhongguancun, Haidian district, Beijing, China

Post code: 100190

Fax: +86-10-82547052-607

Tel: +86-10-82547051

E-mail: pvcenter@mail.iee.ac.cn
